# Supplementary material for: Characterization, Expression Profiling, and Biochemical Analyses of the Cinnamoyl-CoA Reductase Gene Family for Lignin Synthesis in Alfalfa Plants
Source: MDPI journal article supplement (doi:10.3390/ijms23147762), 2022-07-14
Supplement: s1 [file s1]

## Figure S1

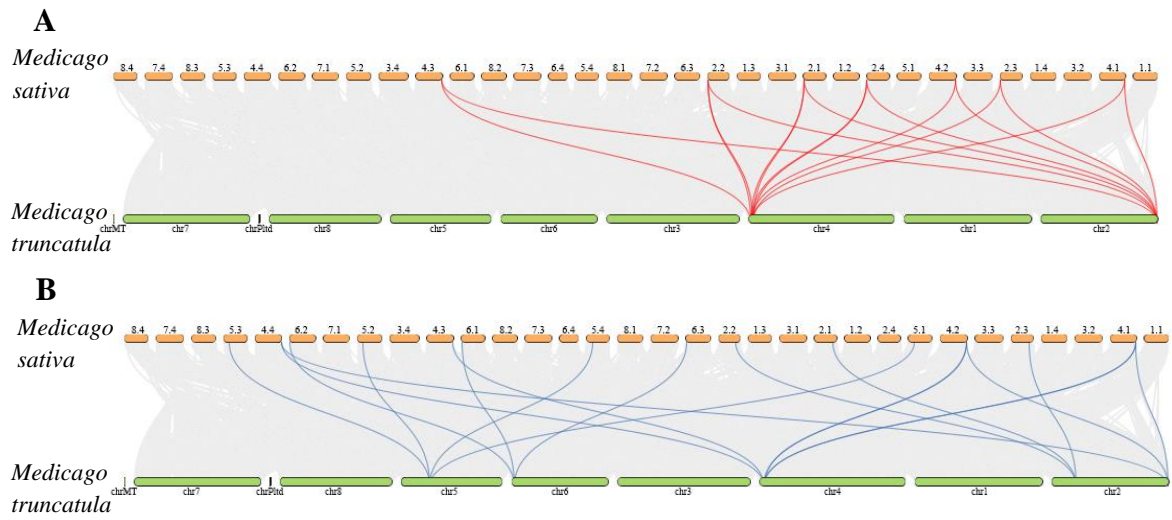

**Figure S1.** The chromosome location and synteny analysis of *CCR/CCR-like* genes in *M. sativa* and *M. truncatula*. Gray lines in the background indicate the collinear blocks within *M. sativa* and *M. truncatula*. The red (**A**, *MsCCRs*) or blue (**B**, *MsCCR-like*s) curves highlight the syntenic *CCR/CCR-like* gene pairs.

**Figure S2**

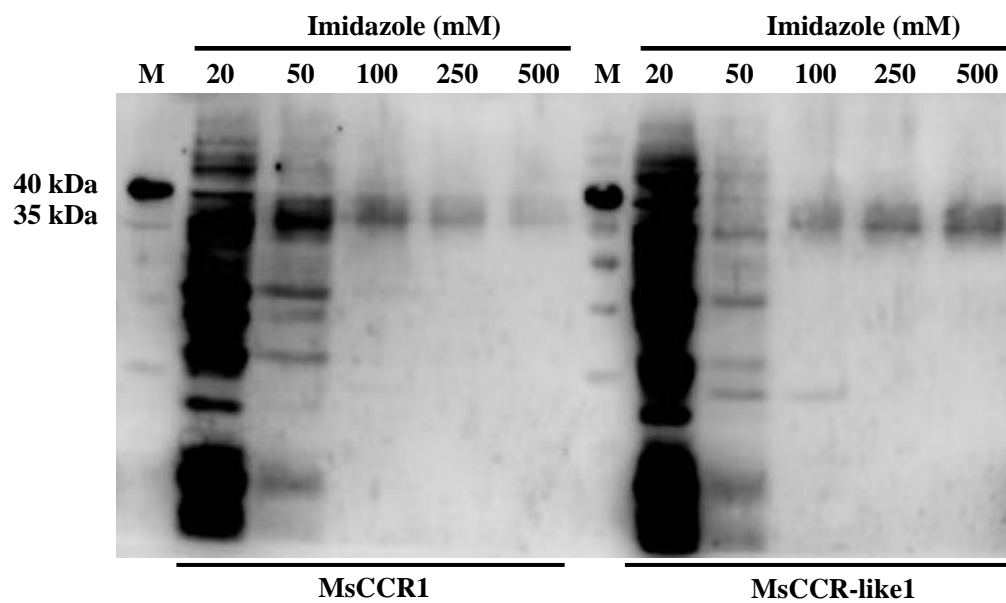

**Figure S2.** Western blot profile of recombinant MsCCR1 and MsCCR-like1. M: protein marker.

**Figure S3**

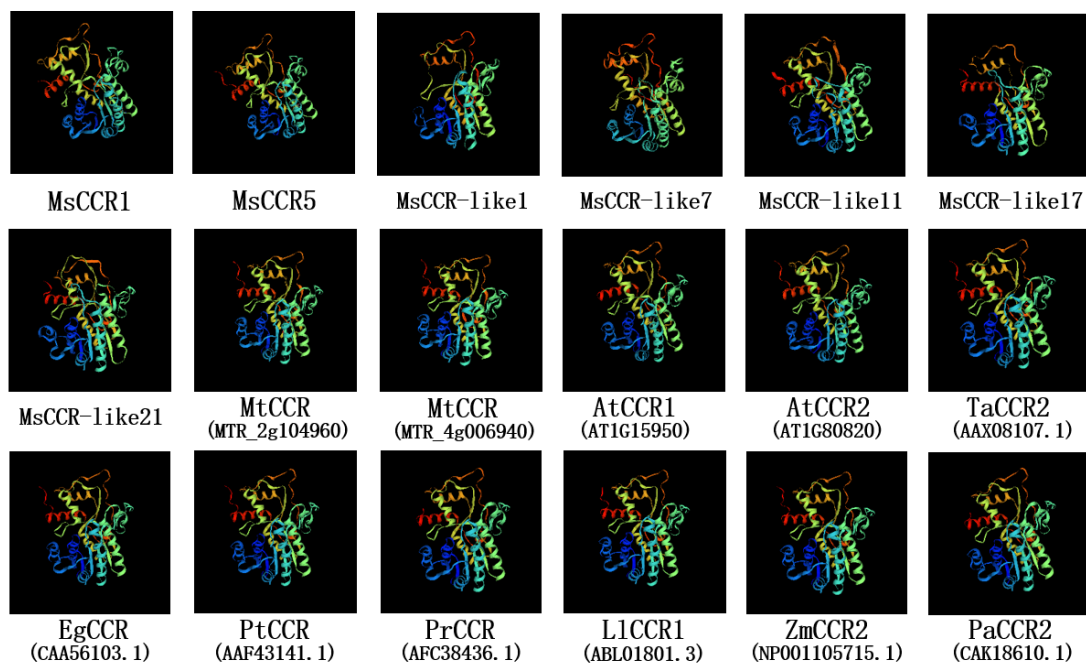

**Figure S3.** Predicted three-dimensional structures of MsCCR/MsCCR-likes and other bona fide CCRs.

**Figure S4**

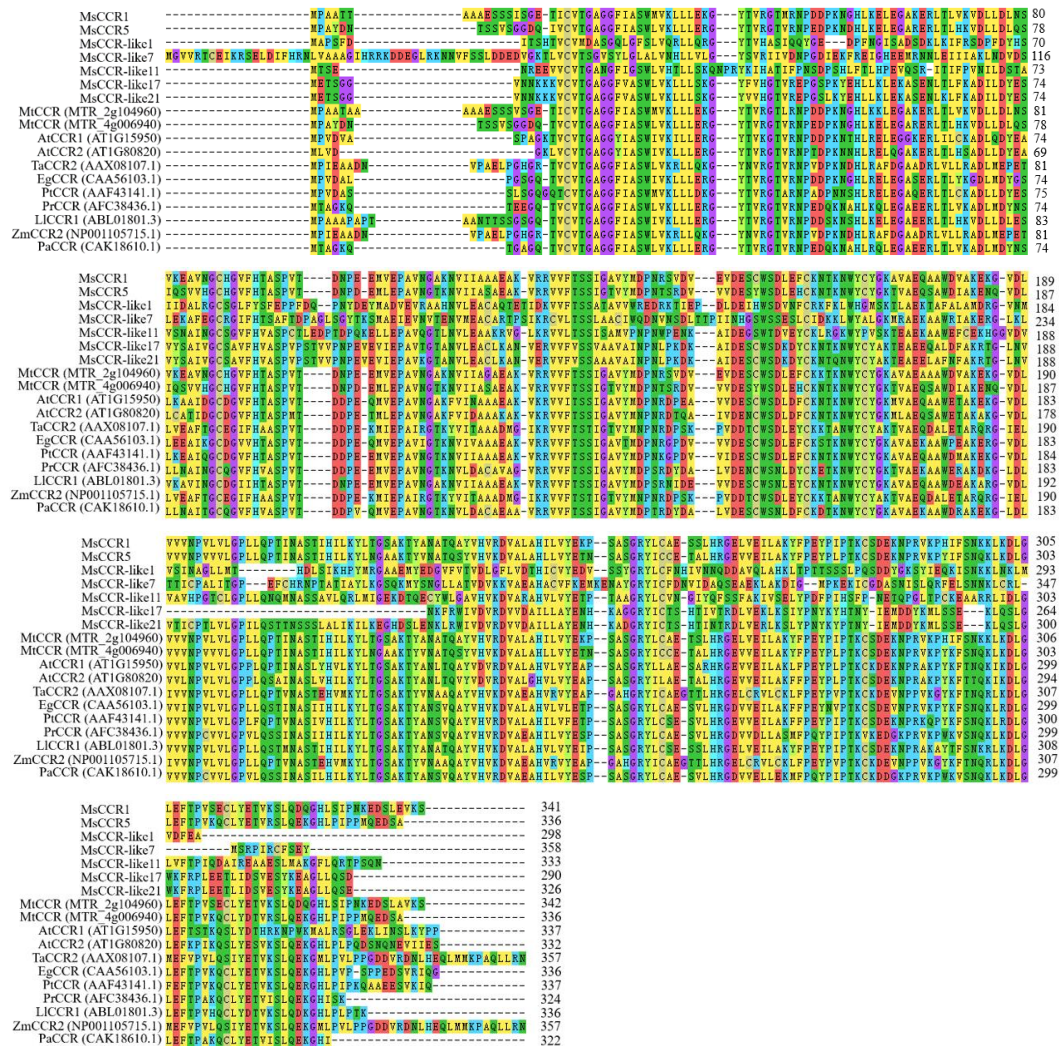

**Figure S4.** Alignments of the MsCCR/MsCCR-like proteins and other bona fide CCRs.

**Table S1.** Properties of *CCR* genes and the predicted *CCR* proteins in *M. sativa*

| Gene Name           | Chromosome Location         | Homologous Gene in<br><i>M. truncatula</i> | Locus Tag of<br>Homologous<br>Gene | pI   | Theoretical<br>MW (Da) | Protein<br>Length |
|---------------------|-----------------------------|--------------------------------------------|------------------------------------|------|------------------------|-------------------|
| <i>MsCCR1</i>       | chr2.1: 1039704 - 1044022   | <i>MtCCR1</i>                              | MTR_2g104960                       | 5.90 | 37205.54               | 341               |
| <i>MsCCR2</i>       | chr2.2: 1307658 - 1311376   | <i>MtCCR1</i>                              | MTR_2g104960                       | 5.90 | 37187.51               | 341               |
| <i>MsCCR3</i>       | chr2.3: 140748 - 144403     | <i>MtCCR1</i>                              | MTR_2g104960                       | 5.90 | 37187.51               | 341               |
| <i>MsCCR4</i>       | chr2.4: 712408 - 716186     | <i>MtCCR1</i>                              | MTR_2g104960                       | 5.90 | 37187.51               | 341               |
| <i>MsCCR5</i>       | chr4.1: 88441560 - 88444191 | <i>MtCCR1-2</i>                            | MTR_4g006940                       | 5.89 | 37271.43               | 336               |
| <i>MsCCR6</i>       | chr4.2: 92674173 - 92676815 | <i>MtCCR1-2</i>                            | MTR_4g006940                       | 5.89 | 37271.43               | 336               |
| <i>MsCCR7</i>       | chr4.3: 88471169 - 88473810 | <i>MtCCR1-2</i>                            | MTR_4g006940                       | 5.89 | 37271.43               | 336               |
| <i>MsCCR-like1</i>  | chr5.4: 20239570 - 20242878 | <i>MtCCR-like SNL6</i>                     | MTR_5g029990                       | 5.00 | 33606.88               | 298               |
| <i>MsCCR-like2</i>  | chr5.3: 18940776 - 18944245 | <i>MtCCR-like SNL6</i>                     | MTR_5g029990                       | 5.00 | 33609.87               | 298               |
| <i>MsCCR-like3</i>  | chr5.2: 18815018 - 18818013 | <i>MtCCR-like SNL6</i>                     | MTR_5g029990                       | 5.00 | 33575.85               | 298               |
| <i>MsCCR-like4</i>  | chr5.1: 20561135 - 20564090 | <i>MtCCR-like SNL6</i>                     | MTR_5g029990                       | 5.00 | 33589.88               | 298               |
| <i>MsCCR-like5</i>  | chr6.1: 1696762 - 1702383   | <i>MtCCR-like SNL6-2</i>                   | MTR_6g406250                       | 7.48 | 39783.82               | 358               |
| <i>MsCCR-like6</i>  | chr6.2: 1718684 - 1724261   | <i>MtCCR-like SNL6-2</i>                   | MTR_6g406250                       | 7.48 | 39849.89               | 358               |
| <i>MsCCR-like7</i>  | chr6.3: 1881162 - 1886448   | <i>MtCCR-like SNL6-2</i>                   | MTR_6g406250                       | 7.48 | 39852.90               | 358               |
| <i>MsCCR-like8</i>  | 15006: 7272 - 10850         | <i>MtCCR1-3</i>                            | MTR_2g028620                       | 5.89 | 36599.74               | 333               |
| <i>MsCCR-like9</i>  | chr2.3: 60709715 - 60713293 | <i>MtCCR1-3</i>                            | MTR_2g028620                       | 5.89 | 36599.74               | 333               |
| <i>MsCCR-like10</i> | chr2.1: 62319777 - 62323333 | <i>MtCCR1-3</i>                            | MTR_2g028620                       | 5.89 | 36623.79               | 333               |
| <i>MsCCR-like11</i> | chr2.2: 59055829 - 59059406 | <i>MtCCR1-3</i>                            | MTR_2g028620                       | 5.94 | 36642.83               | 333               |
| <i>MsCCR-like12</i> | chr4.4: 89890905 - 89894155 | <i>MtCCR1-4</i>                            | MTR_4g009040                       | 5.54 | 35926.18               | 325               |
| <i>MsCCR-like13</i> | chr4.3: 86683346 - 86686357 | <i>MtCCR1-4</i>                            | MTR_4g009040                       | 5.41 | 36184.27               | 326               |
| <i>MsCCR-like14</i> | chr4.2: 91110498 - 91113703 | <i>MtCCR1-4</i>                            | MTR_4g009040                       | 5.43 | 36043.25               | 326               |
| <i>MsCCR-like15</i> | chr8.3: 39385671 - 39389109 | <i>MtCCR1-4</i>                            | MTR_4g009040                       | 5.78 | 36175.44               | 325               |
| <i>MsCCR-like16</i> | chr8.2: 38259260 - 38262698 | <i>MtCCR1-4</i>                            | MTR_4g009040                       | 5.78 | 36175.44               | 325               |
| <i>MsCCR-like17</i> | chr4.2: 90649870 - 90653251 | <i>MtCCR1-4</i>                            | MTR_4g009040                       | 5.93 | 32349.96               | 290               |
| <i>MsCCR-like18</i> | chr4.1: 85995762 - 85999167 | <i>MtCCR1-4</i>                            | MTR_4g009040                       | 6.26 | 36075.51               | 325               |
| <i>MsCCR-like19</i> | chr2.4: 48916854 - 48920360 | <i>MtCCR1-4</i>                            | MTR_4g009040                       | 5.52 | 35988.13               | 326               |
| <i>MsCCR-like20</i> | chr2.2: 46570633 - 46574128 | <i>MtCCR1-4</i>                            | MTR_4g009040                       | 5.94 | 35874.04               | 325               |
| <i>MsCCR-like21</i> | chr4.1: 86755522 - 86759200 | <i>MtCCR1-4</i>                            | MTR_4g009040                       | 5.95 | 36177.50               | 326               |
| <i>MsCCR-like22</i> | chr2.3: 48445104 - 48452492 | <i>MtCCR1-4</i>                            | MTR_4g009040                       | 5.94 | 35861.04               | 325               |
| <i>MsCCR-like23</i> | 15007: 40384 - 43962        | <i>MtCCR1-3</i>                            | MTR_2g028620                       | 5.89 | 36599.74               | 333               |

**Table S2.** Motif compositions of CCR proteins from *M. sativa*.

| Motif No. | Width | Sequences |
|-----------|-------|-----------|
| Motif 1   | 41    |           |
| Motif 2   | 42    |           |
| Motif 3   | 41    |           |
| Motif 4   | 21    |           |
| Motif 5   | 21    |           |
| Motif 6   | 21    |           |
| Motif 7   | 25    |           |
| Motif 8   | 35    |           |
| Motif 9   | 29    |           |
| Motif 10  | 15    |           |
| Motif 11  | 21    |           |
| Motif 12  | 29    |           |
| Motif 13  | 15    |           |
| Motif 14  | 6     |           |
| Motif 15  | 29    |           |
| Motif 16  | 6     |           |
| Motif 17  | 6     |           |
| Motif 18  | 8     |           |
| Motif 19  | 11    |           |
| Motif 20  | 8     |           |



**Table S3.** Sequences of the CCR proteins in important bona fide CCRs.

| Protein names | IDs               | Sequences                                                                                                                                                                                                                                                                                                                                                                               |
|---------------|-------------------|-----------------------------------------------------------------------------------------------------------------------------------------------------------------------------------------------------------------------------------------------------------------------------------------------------------------------------------------------------------------------------------------|
| AtCCR1        | At1G15950         | mpvdvaspagktvcvtgaggyiaswivkillergytkgtvrnpddpknthrlgleggerlilckadldyealkaai<br>dgcgvfhtaspvtddeqmvpeavngakfvinaaaekvrvvtssigavymdnrdpeavdescwsldfck<br>kntknwycygmvaeqaawetakekgvdlvlnpvlvlgpplqptinaslyhvkyltgsaktyanltqayvdvrdv<br>alahvlveyeapsasgryllaesarhrgevveilaklfpeyplptkckdeknprakpykftnqkikldgleftstkqsylda<br>sqesvengikigs                                               |
| AtCCR2        | At1G80820         | mlvdgklvcvtgaggyiaswivklilergytrgtvrnpdpknhlrelqgakerlthlsadlldyealcaticdgcgvf<br>htaspmtdpetmlepavngakfvinaaaekvrvvtssigavymdnrdtqavndencwsldfckntknwyc<br>ygkmlaeqsawetakakgvdlvlnpvlvlgpplqsainaslilhikyltgsaktyanltqayvdvrdvalghvlveya<br>psasgrylaetalhrgevveilakffpeyplptkcsdeknprakpykfttqkikldgleftkpkqslsyesvkslqekghlp<br>lpqdsnqneviies                                      |
| PtCCR         | AAF43141.1        | mpvdasslsggqtcvtgaggyiaswivklldkgytrgtarnpadpnnshlrelegaerltlckadlldyeslkeai<br>qgcgvfhtaspvtddeemvepavngtknviaaaekvrvvtssigavymdpnkdpvdescwsldfck<br>ntknwycygvkavaeqaawmakekgvdlvvnnpvlvlgplfqptvnasivhikyltgsaktyansvqayvhvrdv<br>alahilvfetpsasgrylcsesvlhrgevveilakffpeyptkcsdeknprkqpykfsnqklrdlgleftpvkqclyetv<br>kslqerghlpipkqaaeesvkiq                                        |
| PtrCCR2       | ACC63879.1        | mpvdasslsggqtcvtgaggyiaswivklldkgytrgtarnpadpknshlrglegaeerltlckadlldyeslkeai<br>qgcgvfhtaspvtddeemvepavngtknviaaaekvrvvtssigavymdpnkdpvdescwsldfck<br>ntknwycygvkavaeqaawmakekgvdlvvnnpvlvlgplfqptvnasithikyltgsaktyansvqayvhvrdv<br>alahilvfetpsasgrylcsesvlhrgevveilakffpeyptkcsdeknprkqpykfsnqklrdlgleftpvkqclyetv<br>kslqekghlpipkqaaeeslkiq                                       |
| EgCCR         | CAA56103.1        | mpvdalpgsgqtcvtgaggyiaswivklilergytrgtvrnpddpknghlrelegaserltlykgdlmdygsleeaik<br>gcdgvvhtaspvtddeqmvpeavigtknvinaaaekvrvvtssigavtmdpnrgdpvdescwsldfckst<br>knwycygvkavaekaawpeakergvdlvvinpvlvlgpllqstinasihikyltgsaktyansvqayvhvkdvallah<br>vlvletpsasgrylcaesvlhrgdvveilakffpeynvptkcsdevnprvkpykfsnqklrdlgleftpvkqclyetvksl<br>qekghlpvpsppedsvriqg                                 |
| PhCCR1        | AHX56186.1        | mrsvsgqvvcvtgaggyiaswlvkillekgytrgtvrnpddpknghlrelegakerltlckadlldyqslreaingcdg<br>vfhtaspvtddeqmvpeavigtknvinaaaeanvrvvtssigavymdnrdpetvvdetcsdpdfckntknw<br>ycygmvaeqaaweakekgvdlvvinpvlvlgpplqstinasihikyltgsaktyansvqayvdvdalahill<br>yetpeasgrylcaesvlhrgdvveilskffpeyptkcsdvtkprvkpykfsnqklrdlgleftpvkqclyetvkslqek<br>ghlpipkqdepiiriqp                                          |
| LICCR1        | ABL01801.3        | mpaaapaptaantssgsgqtcvtgaggyiaswivklilergytrgtvrnpddsknshlkelegaeerltlhkvdlldle<br>svkavingcdgihtaspvtdnpeemvepavngaknviaaaekvrvvtssigavymdpnsrndeivdescwsn<br>leyckntknwycygvkavaeqaawdeakargvdlvvnnpvlvlgpllqstmnastihikyltgsaktyanatqayvhv<br>kdvalahvlveyepsasgrylcsesslhrgeveilakyfpeyptkcsdeknprakaytsnkrldlgleftpvhqcl<br>dtvkslqdkghlpptk                                       |
| PrCCR         | AFC38436.1        | mtagkqtteegqtcvtgaggyiaswlvklilergytrgtvrnpedqknahlkqlegaeerltlvkadlmdynslinain<br>gcqgvfhvaspvtddeemvepavngtknvlacavagvrvvtssigavymdpnsrdyaldvencwsnldfck<br>etknwycygvktaekaawerakdkgldlvvnnpvlgpvlqssinasihikyltgsaktyansvqayvhvrdvae<br>ahilvyespsasgrylcaesvlhrgdvdlasmfpqypiptkvkedgkprvkpwksnqklrdlgleftpakqclyet<br>vislqekghisk                                                |
| PaCCR         | CAK18610.1        | mtagkqtgagqtcvtgaggyiaswlvklilergytrgtvrnpedqknahlrqlegaeerltlvkadlmdynslinaitg<br>cqgvfhvaspvtddpvqmvpeavngtknvlacaeaavrvvtssigavymdpntrdyaldvdescwsnldfckdt<br>knwycygvkavaekaawdrakekgldlvvnnpvlgpvlqssinasihikyltgsaktyansvqayvhvrdvaea<br>hilvyespsasgrylcaesvlhrgdvvellemfqpypiptkckddgkprvkpwksnqklrdlgleftpakqclyet<br>vislqekghi                                               |
| ZmCCR1        | NP001105488<br>.1 | mtvvdavvsstdagapaaatavpagngqtcvtgaaggyiaswlvklillekgytkgtvrnpddpknahlkaldgaa<br>erlilckadlldydaicravqgcgvfhtaspvtddeqmvpeavrgteyvinaaaegavrvvtssigavtmdpkrg<br>pdvvdvdescwsldfcketrnwycygvkavaehaawetarrgvdlvvnnpvlvlgpplqatvnasiahikylgdsar<br>tfanavqayvdvrdadahrvfesprasgrhlcaervlhredvvrilaklfpeypvparcsdevnprkqpykfsnqklr<br>dlglqfrpvsqsyldtvknlqekghlpvgertteaadkdaptaemqgggiara |
| TaCCR1        | ABE01883.1        | mtvvaaaaaaaqelpghgqtcvtgaaggyiaswlvklilergytkgtvrnpddpknahlkaldgaerlvlckadll<br>dydaicaavegchgvfhtaspvtddeqmvpeavrgteyvinaaadagtrrvgtssigavtmdpnrgdpvvd<br>scwsldfckktknwycygvkavaeqaawekaaargvdlvvnnpvlvlgpplqptvnasaahikylgdsakkyana<br>vqayvnvrdvaaahrvfeapgasgrhlcaervlhredvvhilgklfpeypvptrcsdevnprkqpykmsnqklqdl                                                                  |

|                       |                   |                                                                                                                                                                                                                                                                                                                                                                                    |
|-----------------------|-------------------|------------------------------------------------------------------------------------------------------------------------------------------------------------------------------------------------------------------------------------------------------------------------------------------------------------------------------------------------------------------------------------|
|                       |                   | glqftpvnslslyetvkslqekghlpaprkdilpaeldgata                                                                                                                                                                                                                                                                                                                                         |
| TaCCR2                | AAX08107.1        | mpieaadnvpaelpghgrtvcvtgaggfiaswlvkrllqkgynvrgtvmnpvdpkndhlrafdgaadrllradlme<br>petlveaftgcegifhaasptddpekniepairgkyvitaadmgikrvvftstigtvymnpnrpskpvdtdcwsd<br>leyckktanwycyaktvaeqdaletarqrgielivnpvvlvgpllqptvnastehvmkyltgsaktyvnaaqayvhvk<br>dvaeahrvryeapgahgryicaegtllhrgeclrvlcklfpeypvptckckdevnppvkgykftnqrklldgmefvpvl<br>qsiyetvkslqekgmlpvlppgddvrdnlheqlmmkpaqlrm     |
| ZmCCR2                | NP001105715<br>.1 | mptaeattvppeelssgggrtvcvtgaggfiaswlvkrllqkgytvrgtvmnpvdpkndhlraldgavdrllradlldp<br>qslaeafsgcdgvfhaasptddpemmiepairgtryvmaadagvkrvvtssigtvymnpyrpskpvdtdcw<br>sdleyckntqnwycyaktvaeqgawevarkrgldlvvnpvvlvgpllqptvnastdhvmkyltgsattyvnaaqay<br>vhvrdvaeahrvryeaphahgryicaestlhrgdclrvlaklfpeypvptckckdqvnpvpygkftnqrklldgmdfv<br>pvlqclyetvtslqekgmlpvlptkqdhqdlgks                 |
| StCCR                 | NP001274901<br>.1 | mpsesgkvvcvtgaggfiaswlvkllelqkgytvrgtvmnpddpknghlkelegakerlillradlldyqslreaiygcdg<br>vfhtasptddpeqmvepavigtknvitaaeakvgrvvtssigtvymdnrapdkvvdetewsdlgfckntknw<br>ycygmtvaektawdearekgvdlvvinpvlvgpllqptvnasvlhilkyltgsaktyansiqayvhvkdvahalillye<br>apsasgryicaesvlhrgdvveilakffpeypiptkcsdetrprakpykftnqklldlgftpvkqclyetvkslqekghl<br>piptqndepikihs                             |
| OsCCR                 | CAD21520.1        | mssnfeannnngkqlvcvtgaggfigswvkvellirgyhvrgtardpadsknahllelegadqrlsclradvldaaslr<br>aafsgchgfvfhaspvsndpdlvpvavegtrnvinaadmgvrrvvtssygavhmnpsrspdavldetewsdylef<br>crqtdnlyccakmmaemtateeaakrglelavvpsmtmgpmlqqlnfssnhvarylmgtkksynpavaayvdv<br>rdvarahlvryerpdargrylcigtvlhraellrmlrdlfpqypatakceddgkpmakpykfsnqrklldgleftplrksl<br>heavlcmmqkshlpiypvpkraly                       |
| TpCCR                 | PNY09320.1        | mstydnislvsqtdqtcvtgaggfiaswlvkllelqkgytvkgtrmpdpknshlkelegarerlthkvdlldlksiqsv<br>ihgchgfvfhtasptdnpeemlepavgygtnviiisaaekvrrvvtssigtvymnpntrsrdvvdesywsdleyckn<br>tknwycygmtvaeqsawdiakenqvdlvvinpvlvgpllqptvnastmhilkylngsaktyvnatqsyvsvkdv<br>ahvlvyetnsasgryicsdaslhrgevveilakyfpeyplptk                                                                                      |
| PdCCR                 | AGS10092.1        | mtvvdaassaaavaqpagnqtcvtgaggyiaswlvkllelqkgytvkgtrmpdpknahlralegaerlilckadl<br>ldydaicravqgcqgvfhtasptddpeqmvepavrgteyvisaaaeagtrrrvvtssigavtmdpnrgpdvvdes<br>cwsdlefccktrnwycygvkaeaaqawdaarhrgvdlvvinpvlvgpllqptvnasighvlyldgsartfanavq<br>ayvdvrdvadahrvfespraagrhlcaervlhrdvdldaklfpeypvptcrsdevnprkqpykfsnqklrdlglefts<br>vsqsyldtvklqekghlpvpvpdeqtateakktvapaelqqggiara     |
| HvCCR                 | AAN71760.1        | mtvvdaaaavaqelpghgqtcvtgaaggyiaswlvkllelqkgytvkgtrmpdpknahlkaldgaerlvlckadlld<br>ydaicaavegchgfvfhtasptddpeqmvepavrgteyvidaadagtrrrvvtssigavtmdpnrgpdvvdesc<br>wsdlefccktknwycygvkaeaaqawekarargvdlvvinpvlvgpllqptvnasaahilkylldgsarkyanavq<br>ayvdvrdvagahlrveapqasgrylcaervlhrqdvvhilaklfpeypvptcrsdevnprkqpykmsnqklqldglk<br>ftpvnslslyetvkslqekghlpvprkdilapqldgata            |
| MtCCR1                | XP003604238<br>.1 | mpaydntssvsggdqtcvtgaggfiaswlvkllelqkgytvrgtvmnpdpknghlkelegarerlthkvdlldlqsiqs<br>vvhgchgfvfhtasptdnpeemlepavngtknviiisaaekvrrvvtssigtvymdntrsrdvvdesywsdlehc<br>kntknwycygmtvaeqsawdiakenqvdlvvinpvlvgpllqptvnastihilkylngaaktyvnatqsyvhkdv<br>alahllvyetnsasgryicetalhrgevveilakyfpeyplptkcsdeknprvkpykfsnqklldgleftpvkqcltydt<br>vrsdqekghlppmqedsa                            |
| MtCCR-li<br>ke SNL6   | MTR_5g0299<br>90  | mapsfditshtvcvmdasqqlgflvqrlrqgytvhasiqqygenpfnisadsdklifrdsdpdyhsiidalrgcsglf<br>ysfepldqpnpydeymadvevraahnleacaqtetidkvvtssatavvwredrtiepdldeihwsdvnfcrkfl<br>whgmsktlaektafalamdrgvnmvsinagllmthdlsikhpylrgaaemyedgvftvdlglvldthicvyedvss<br>ygrylcfnihtqddavqlahkltpatasslpqsddygksyieqkisknklmlmvdfa                                                                          |
| MtCCR-li<br>ke SNL6 2 | MTR_6g4062<br>50  | mgvvrtcaikrseldifhrnlvaaagihrrkdddeglrknklfsslddedvgktlvcvtsgvsylglalvnhllvlgysvrii<br>v<br>dnpgdreklreirheemrnnleiiiaklndvdslvkafegrgifhtsaftdpaglsygtksmaeievnvtenvmeacart<br>psikrcvftsslaaciwdnvnsdlttppinhgswsseslcidkklwyalgkmraekaawrianergkltticpalitgpe<br>fchrnptataylkaqkmysngllatvdvkkvaeahacvfkemnenaygryicfdnvidaqaeklakdigmpke<br>kicgdasnislqryelsnnklrmlsrpircsen |
| AtCCR-li<br>ke        | AT4g30470         | mdhdkstscvvldastvvgfwilkkllsrgysvhaairngeseieemiremetteerlvvydvldvdyqsilvslkte<br>nvvfclldspegydekevdlervgainvveacgrtesiekivfsslstasiwrndnigtqkdvdekcsddqfcrskklw<br>halakmlsekaawalamdrlnmvsinpvlvgpsvaqharnptmsylkgaaqmyengvlayvdvklfladvhira<br>fedvsacgryfcfnqivnteeeklveslsplimppryenemhgsevyeerlrnnksklveagsac                                                               |



**Table S4.** Primer sequences for RT-qPCR.

| Primer name         | sequences                   | T <sub>m</sub> (°C) | Product length |
|---------------------|-----------------------------|---------------------|----------------|
| <i>Group Ia</i>     | F: TTATGTGCTGAAAGTTCAC      | 57.94               | 159 bp         |
|                     | R: CTCCAATCCCAAATCCTTCAGT   | 58.03               |                |
| <i>Group Ib</i>     | F: GAGGCTAACTTTGCATAAGGTTGA | 59.30               | 161 bp         |
|                     | R: ACGCTATAATCACATTCTTTGT   | 53.92               |                |
| <i>Group II</i>     | F: ACAGCGTTTGCCTTAGCAATGGAC | 64.40               | 158 bp         |
|                     | R: AAAAATCCTAAATCAACGGTCA   | 54.28               |                |
| <i>Group III</i>    | F: TTGTATTTGGCAAGACAATGTGAA | 57.85               | 213 bp         |
|                     | R: TGACAAAATTCAGGACCTGTGATA | 58.12               |                |
| <i>Group IV</i>     | F: AGAAGCAGCAAAACGCGTGGGT   | 66.01               | 142 bp         |
|                     | R: CCCCTCAACTTACAGTACTCAAC  | 60.56               |                |
| <i>MsCCR-like17</i> | F: CTGGACTTAACGTGAATAAG     | 51.38               | 165 bp         |
|                     | R: GAAATTGAAGAGTATATATCCCA  | 51.24               |                |
| <i>Actin2</i>       | F: AAAAGGATGCCTATGTTGGTG    | 56.48               | 186 bp         |
|                     | R: TAAGTGGAGCCTCAGTTAGAAGTA | 58.42               |                |
